# Supplementary material for: Improved optical quality of heteroepitaxially grown metal–organic framework thin films by modulating the crystal growth
Source: Royal Society of Chemistry journal article supplement (doi:10.1039/d4nr01885k), 2024-01-01
Supplement: d4nr01885k1.pdf [file d4nr01885k1.pdf]

## Supplementary Information

### **Improved optical quality of heteroepitaxially grown metal–organic framework thin films by modulating the crystal growth**

Yuka Koseki,<sup>a</sup> Kenji Okada,<sup>\*a</sup> Shotaro Hashimoto,<sup>b</sup> Shun Hirouchi,<sup>b</sup> Arisa Fukatsu<sup>a</sup> and Masahide Takahashi<sup>\*a</sup>

<sup>a</sup> *Department of Materials Science, Graduate School of Engineering, Osaka Metropolitan University, Sakai, Osaka, 599–8531, Japan.* <sup>b</sup> *Department of Materials Science, Graduate School of Engineering, Osaka Prefecture University, Sakai, Osaka, 599–8531, Japan.*

### **Synthesis of the Cu<sub>2</sub>(bdc)<sub>2</sub>dabco thin film with a three times-thicker Cu(OH)<sub>2</sub>-oriented thin film**

A three times thicker Cu(OH)<sub>2</sub>-oriented film on a Si wafer (~15 mm × 20 mm) was prepared by three-times repeated transfer process of Cu(OH)<sub>2</sub>. H<sub>2</sub>bdc (4 mM) and dabco (256 mM) were dissolved in methanol (50 mL) at 40 °C in advance. A Cu(OH)<sub>2</sub>-oriented film was immersed in 50 mL of the solution and left for an hour at 60 °C. Subsequently, the film was removed from the solution, washed with ethanol, and dried.

### **Synthesis of the Cu<sub>2</sub>(bdc)<sub>2</sub>dabco thin film at 40 °C**

H<sub>2</sub>bdc (4 mM) and dabco (256 mM) were dissolved in methanol (50 mL) at 40 °C in advance. A Cu(OH)<sub>2</sub>-oriented film on a Si wafer was immersed in 50 mL of the solution and left for an hour at 40 °C. Subsequently, the film was removed from the solution, washed with ethanol, and dried.

### **Synthesis of the Cu<sub>2</sub>(bdc)<sub>2</sub>dabco thin film at 80 °C**

H<sub>2</sub>bdc (4 mM) and dabco (256 mM) were dissolved in methanol (50 mL) at 40 °C in advance. The solution (50 mL) was transferred to an autoclave. A Cu(OH)<sub>2</sub>-oriented film on a Si wafer was immersed in the solution in an autoclave and left for an hour at 80 °C. After an hour, the autoclave was cooled to room temperature. Subsequently, the film was removed from the solution, washed with ethanol, and dried.

### **Synthesis of oriented Cu<sub>2</sub>(bdc)<sub>2</sub> thin films with modulator**

Cu<sub>2</sub>(bdc)<sub>2</sub> thin films on Si wafer (~15 mm × 15 mm) were fabricated by a reported method<sup>1</sup>. Saturated ligand solutions (2.86 mL of water and 7.14 mL of ethanol mixture containing 1 mg of H<sub>2</sub>bdc) were prepared. Diluted acetic acid (1742 mM) and sodium acetate (molar ratio 1:9) were added to the saturated ligand solution at predefined concentration up to 10 mM and dissolved with sonication. Cu(OH)<sub>2</sub> oriented films on Si wafers were immersed in the solution and left for 10 min at room temperature. After 10 min, the films were removed from the solution, washed with ethanol, and dried by an air gun.

### **Synthesis of Cu<sub>2</sub>(2,6-ndc)<sub>2</sub>dabco oriented thin films with modulator**

Cu<sub>2</sub>(2,6-ndc)<sub>2</sub>dabco thin films on Si wafer (~15 mm × 20 mm) were fabricated by a modified reported method<sup>2</sup>. 2,6-H<sub>2</sub>ndc (1 mM) and dabco (64 mM) were dissolved in methanol at room temperature. Diluted acetic acid (1742 mM) and sodium acetate (molar ratio 9:1) were added to the methanol solution at predefined concentration up to 20 mM and dissolved with sonication. Cu(OH)<sub>2</sub> oriented films on Si wafers were immersed in 30 mL of the solution and left for 2 hours at 60°C. After 2 hours, the films were removed from the solution, washed with ethanol, and dried by an air gun.

### **Synthesis of a random Cu<sub>2</sub>(bdc)<sub>2</sub>dabco thin film on a silica glass**

A random assembly film of Cu(OH)<sub>2</sub> nanobelts on a silica glass (~20 mm × 20 mm) was fabricated by drop cast of dispersed solution<sup>3</sup> of Cu(OH)<sub>2</sub>, H<sub>2</sub>bdc (4 mM) and dabco (256 mM) were dissolved in methanol at 40°C. Diluted acetic acid (1742 mM) and sodium acetate were added to the methanol solution as the modulator (30 mM) where the molar ratio of acetic acid and sodium acetate was fixed at 9:1 and dissolved with sonication. A random Cu(OH)<sub>2</sub> thin film was immersed in 10 mL of the reaction solution in a teflon container and left for an hour at 60 °C. Subsequently, the films were removed from the solution, washed with ethanol, and dried by an air gun. Thickness of the obtained random Cu<sub>2</sub>(bdc)<sub>2</sub>dabco thin film was 384 nm.

### **Measurement of degree of in-plane orientation**

The degrees of in-plane orientation were determined using the full width at half maximum (FWHM) of the peaks of the azimuthal angle profiles ( $\phi$  scan profiles) in the same method as our previous work<sup>4</sup>. The equation (1) was used to calculate the degrees of in-plane orientation ( $F_{XRD}$ ).

$$F_{XRD} = \frac{180^\circ - FWHM}{180^\circ} \#(1)$$

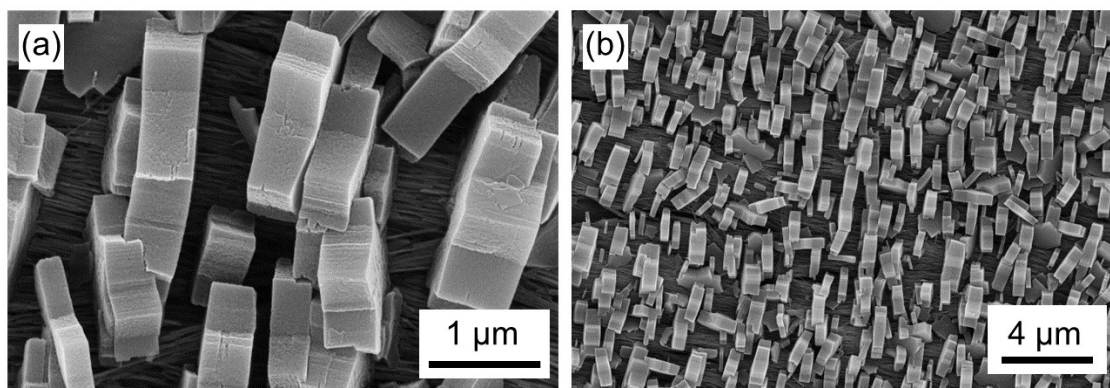

Fig. S1 (a, b) SEM images of  $\text{Cu}_2(\text{bdc})_2\text{dabco}$  thin films fabricated without a modulator. Direction of  $a$ - and  $c$ - axis is vertical direction and horizontal direction of images, respectively. The  $\text{Cu}_2(\text{bdc})_2\text{dabco}$  thin films was prepared according to our previous study<sup>2</sup>. The films were fabricated using methanol solution (50 mL) including  $\text{H}_2\text{bdc}$  (4 mM) and dabco (256 mM) at 60 °C for an hour.

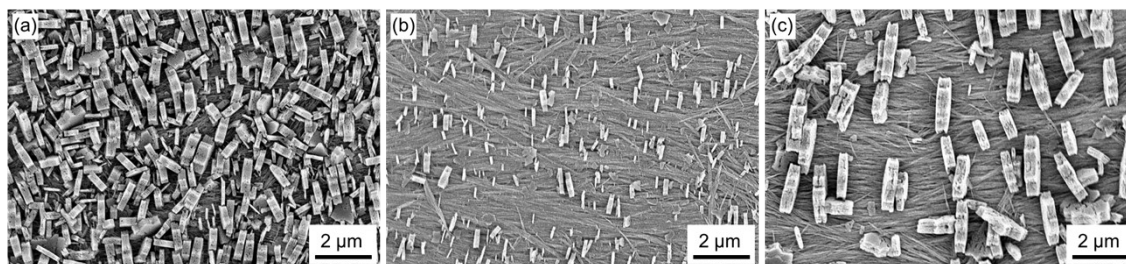

Fig. S2 (a) An SEM image of the  $\text{Cu}_2(\text{bdc})_2\text{dabco}$  thin film fabricated from a three-times thicker  $\text{Cu}(\text{OH})_2$  thin film. SEM images of  $\text{Cu}_2(\text{bdc})_2\text{dabco}$  thin films fabricated at (b) 40 °C and (c) 80 °C.

The effect of amount of Cu source and reaction temperature on the crystal morphologies was investigated. Although number of crystals per area and size of crystals changed slightly in both cases, morphologies (aspect ratio) and orientation of crystals little change. Therefore, these conditions were not dominant factors for controlling the morphologies of the MOF crystals in order to fabricate high-quality  $\text{Cu}_2(\text{bdc})_2\text{dabco}$  thin films.

**(a) Out-of-plane measurement**

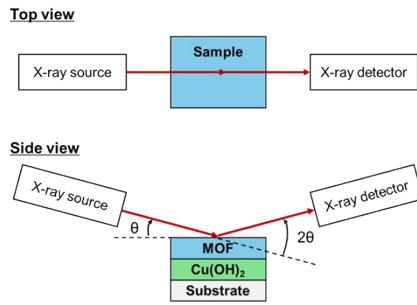

**(b) In-plane measurement**

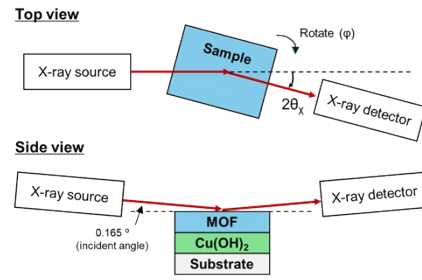

**(c) Azimuthal angle dependence measurement**

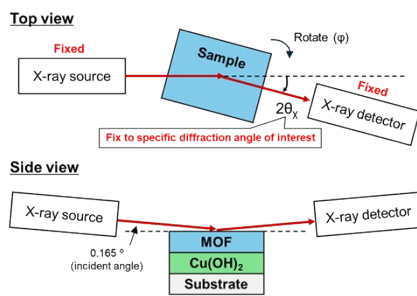

**Top view of in-plane (parallel)**

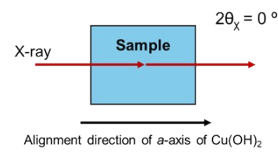

**Top view of in-plane (perpendicular)**

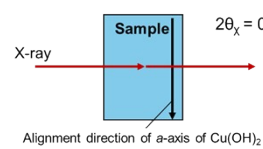

Fig. S3 Schematic illustration of the experimental setups characterize the MOF thin films for (a) out-of-plane, (b) in-plane and (c) azimuthal angle dependence measurements.

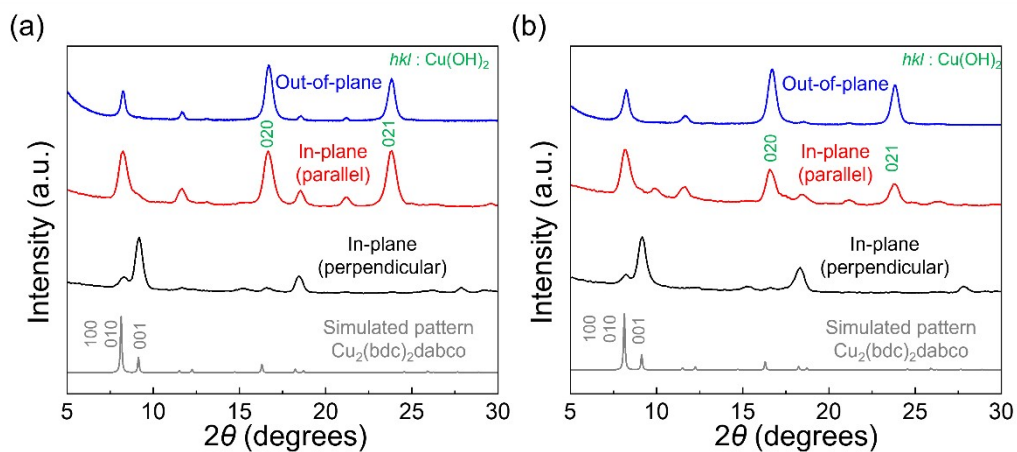

Fig. S4 XRD patterns of oriented Cu<sub>2</sub>(bdc)<sub>2</sub>dabco thin films fabricated (a) without and (b) with a modulator (30 mM).

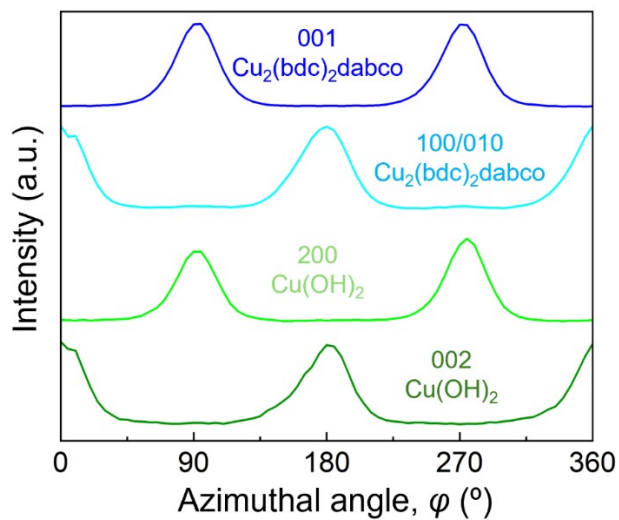

Fig. S5  $\varphi$  scan profiles for the 001 and 100/010 reflection of  $\text{Cu}_2(\text{bdc})_2\text{dabco}$  and the 200 and 002 reflection of  $\text{Cu}(\text{OH})_2$  in oriented  $\text{Cu}_2(\text{bdc})_2\text{dabco}$  thin films fabricated with a modulator (30 mM). The X-ray incident angle is perpendicular to the longitudinal direction of the nanobelts at  $\varphi=0^\circ$ . The in-plane orientation of  $\text{Cu}(\text{OH})_2$  and  $\text{Cu}_2(\text{bdc})_2\text{dabco}$  in the film was calculated to be 82% and 81% from the full width at half maximum.

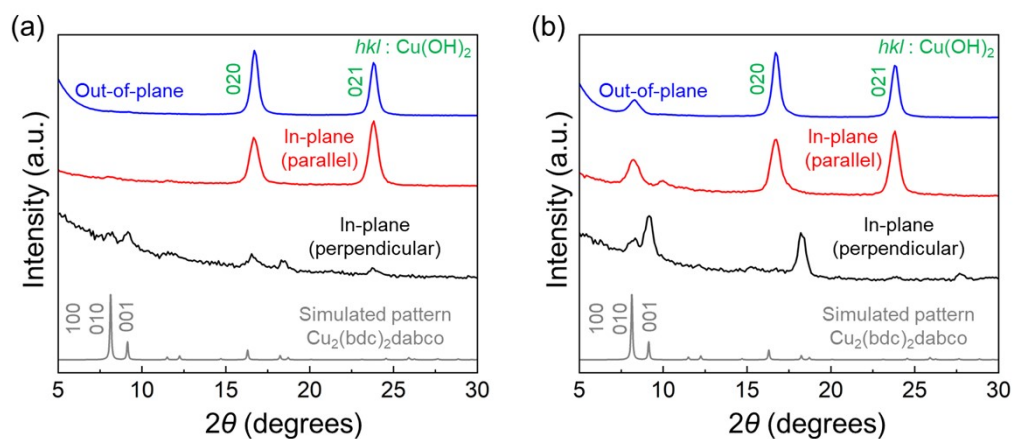

Fig. S6 XRD patterns of the  $\text{Cu}_2(\text{bdc})_2\text{dabco}$  thin films (reaction time: 2.5 min) fabricated (a) without and (b) with a modulator (30 mM).

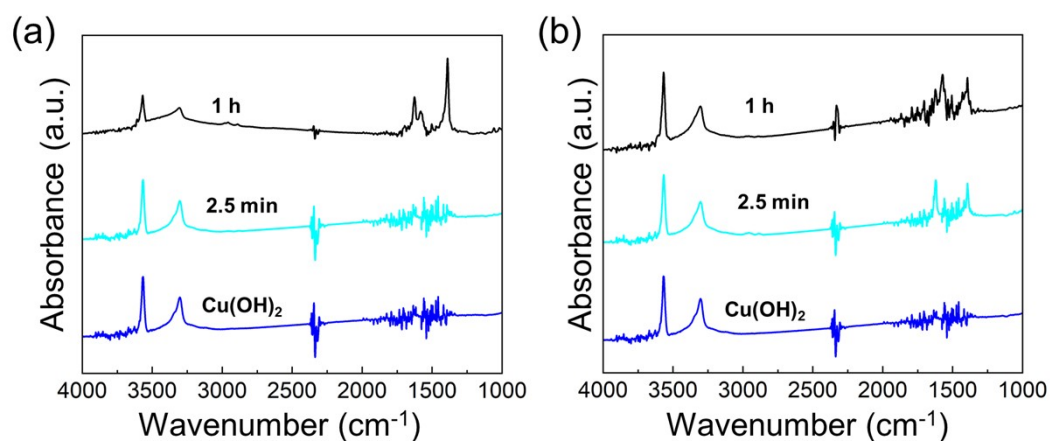

Fig. S7 FT-IR spectra of the  $\text{Cu}(\text{OH})_2$  oriented thin films and  $\text{Cu}_2(\text{bdc})_2\text{dabco}$  thin films fabricated (a) without a modulator and (b) with 30 mM of a modulator in varied reaction times.

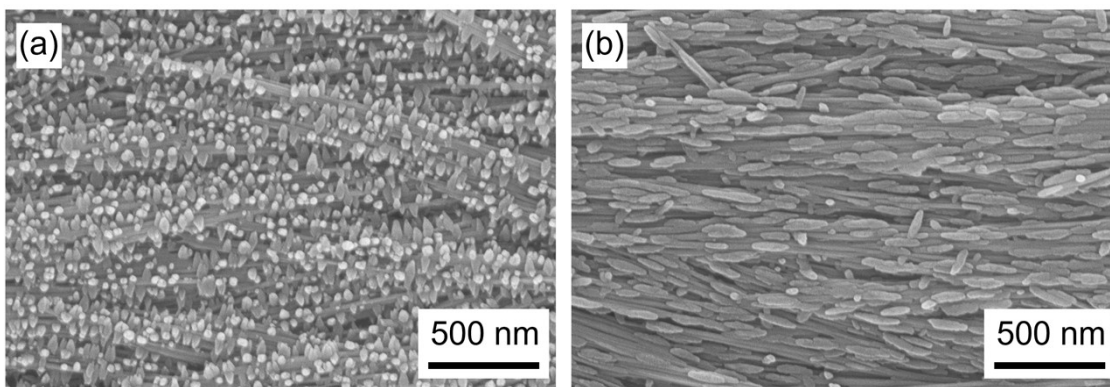

Fig. S8 SEM images of  $\text{Cu}_2(\text{bdc})_2$  thin films fabricated (a) without and (b) with a modulator (10 mM).

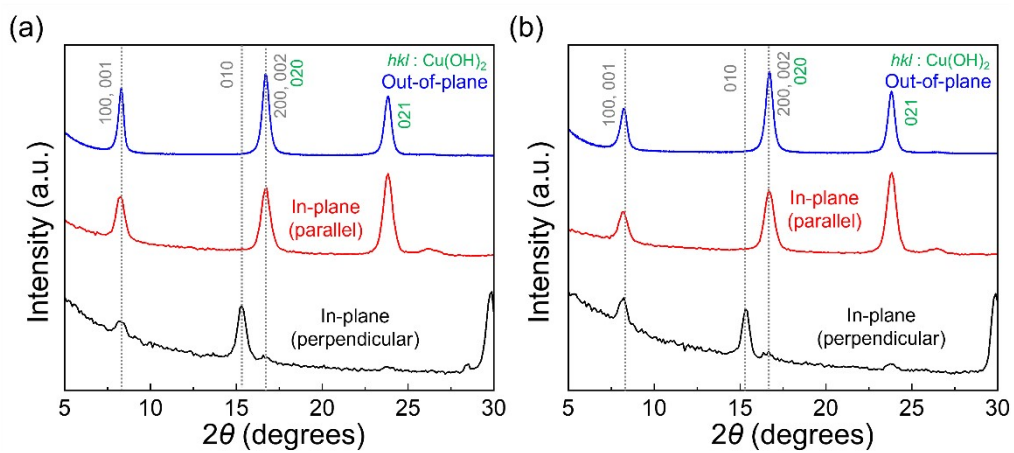

Fig. S9 XRD patterns of  $\text{Cu}_2(\text{bdc})_2$  thin films fabricated (a) without and (b) with a modulator (10 mM).



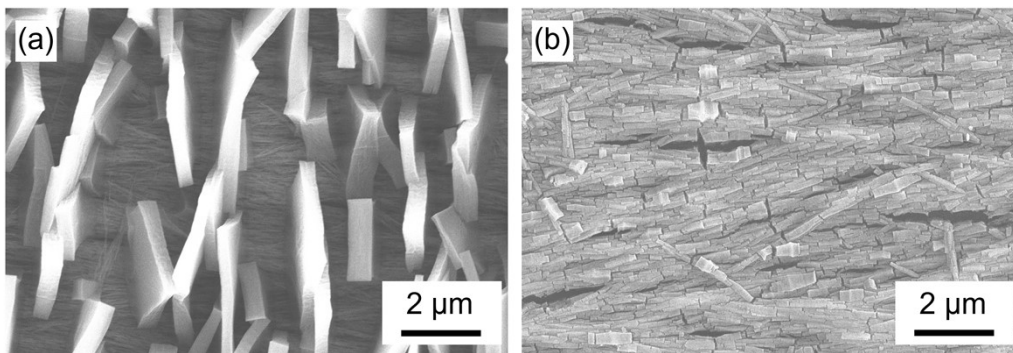

Fig. S10 SEM images of  $\text{Cu}_2(2,6\text{-ndc})_2\text{dabco}$  thin films fabricated (a) without and (b) with a modulator (20 mM). Direction of  $a$ - and  $c$ - axis is vertical direction and horizontal direction of images, respectively.

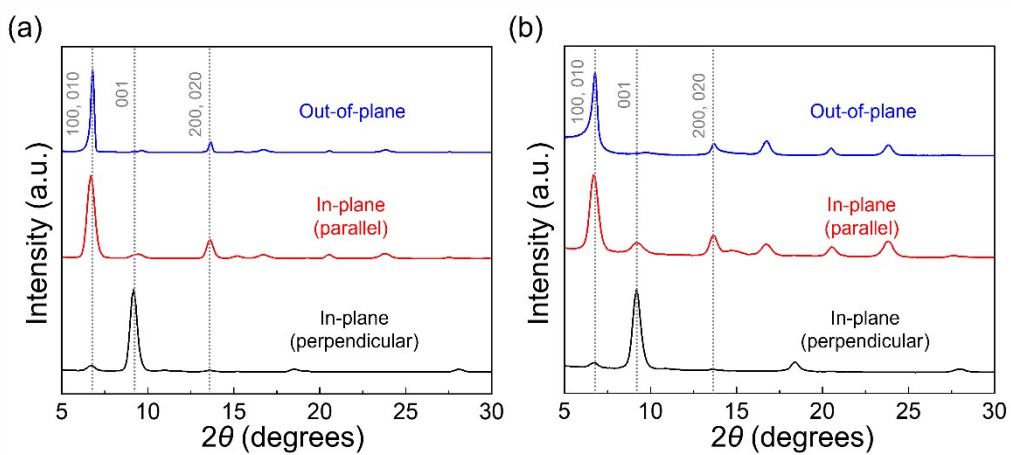

Fig. S11 XRD patterns of  $\text{Cu}_2(2,6\text{-ndc})_2\text{dabco}$  thin films fabricated (a) without modulator and (b) with a modulator (20 mM).

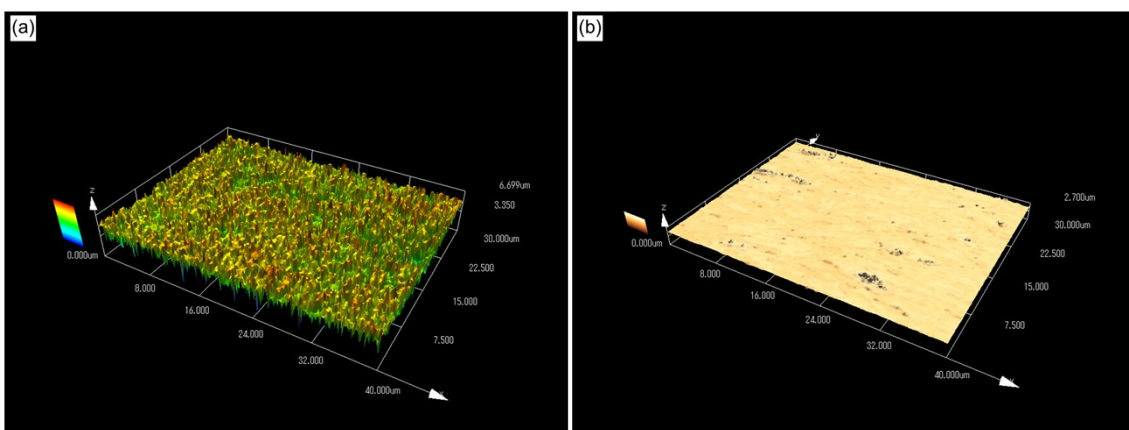

Fig. S12 Images of three-dimensional morphologies of surface of  $\text{Cu}_2(\text{bdc})_2\text{dabco}$  fabricated (a) without and (b) with a modulator (30 mM) measured by CLSM.

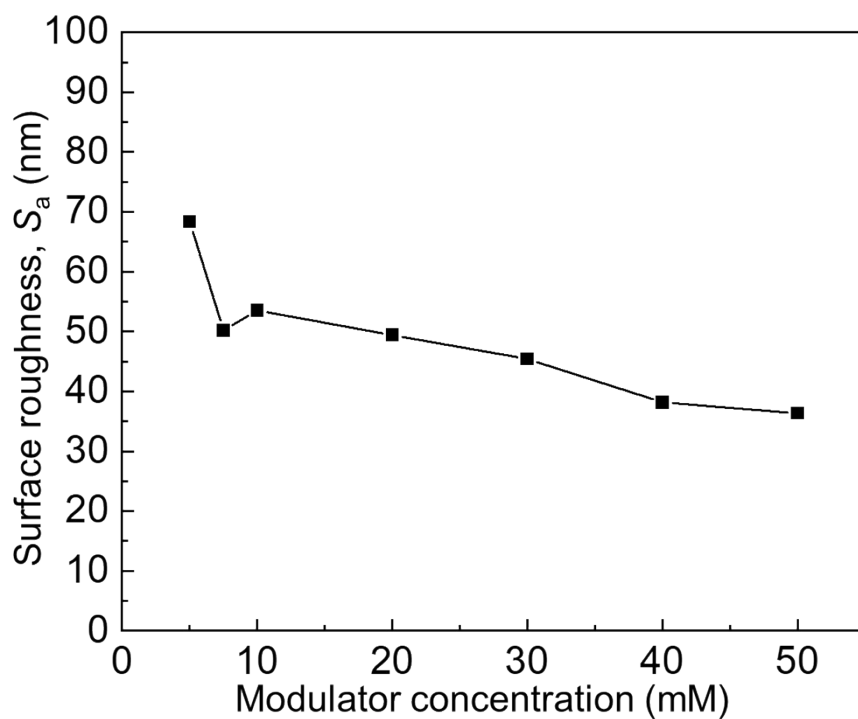

Fig. S13 Surface roughness measured by AFM of  $\text{Cu}_2(\text{bdc})_2\text{dabco}$  thin films fabricated with each concentration of the modulator.

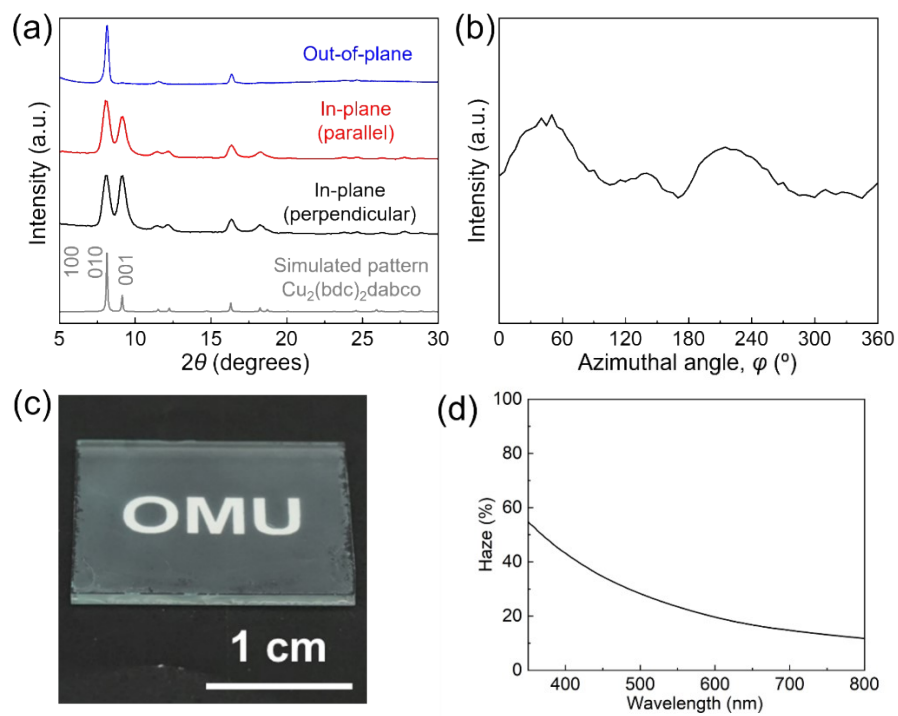

Fig. S14 (a) XRD patterns , (b)  $\phi$  scan profiles for the 001 reflection of  $\text{Cu}_2(\text{bdc})_2\text{dabco}$ , (c) a photo image and (d) haze spectrum of the random  $\text{Cu}_2(\text{bdc})_2\text{dabco}$  thin film fabricated with a modulator (30 mM).

## Reference

1. K. Ikigaki, K. Okada, Y. Tokudome, T. Toyao, P. Falcaro, C. J. Doonan and M. Takahashi, *Angew. Chem. Int. Ed.*, 2019, **58**, 6886–6890.
2. K. Okada, M. Nakanishi, K. Ikigaki, Y. Tokudome, P. Falcaro, C. J. Doonan and M. Takahashi, *Chem. Sci.*, 2020, **11**, 8005–8012.
3. P. Falcaro, K. Okada, T. Hara, K. Ikigaki, Y. Tokudome, A. W. Thornton, A. J. Hill, T. Williams, C. Doonan and M. Takahashi, *Nat. Mater.*, 2017, **16**, 342–348.
4. B. Baumgartner, K. Ikigaki, K. Okada and M. Takahashi, *Chem. Sci.*, 2021, **12**, 9298-9308
